# Supplementary material for: Association between celiac disease and fibromyalgia and their severity: a cross-sectional study
Source: PeerJ. 2024 Aug 30;12:e17949. doi: 10.7717/peerj.17949 (PMC11368088; doi:10.7717/peerj.17949)
Supplement: Supplemental Information 1 — The raw demographic datas, type of antibodies and results of fibromyalgia questionnaires. [file peerj-12-17949-s001.xlsx]

## Sheet: Rawdata
PATIENTS	AGE	GENDER	WEIGHT	HEIGHT	BODYMASSINDEX	PROFESSION	EDUCATION	DURATION OF DISEASE	HYPERTENSION	DIABETES MELLITUS	THYROID DISEASE	ASTHMA	RHEUMATIC DISEASES	OTHER DISEASES	CELIAC CLINICAL TYPE	BIOPSY PATHOLOGICAL TYPE	ANTIGLIADIN ANTIBODY	ENDOMYSIUM ANTIBODY	ANTI-RETICULIN ANTIBODY	TISSUE TRANSGLUTAMINASE ANTIBODY	WIDESPREAD PAIN INDEX	SYMPTOM SEVERITY SCALE	FIBROMYALGİA	FIBROMYALGIA IMPACT QUESTIONNAIRE
1	33	Female	52	165	19.1001	Unemployed	Secondary School	72	No	No	No	No	No	No	Classic	Not classified	Negative	Not Analyzed	Not Analyzed	Negative	11	6	There is	65.86
2	33	Female	55	165	20.202	Worker	High School	60	No	No	No	No	No	No	Classic	Type 3	Negative	Negative	Not Analyzed	Positive	11	7	There is	32.3
3	47	Female	75	151	32.8933	Retired	Primary School	60	There is	There is	No	No	No	No	Silent	Type 3	Negative	Positive	Not Analyzed	Positive	14	10	There is	67
4	42	Female	35	140	17.8571	Unemployed	Primary School	240	No	No	No	No	No	No	Silent	Type 2	Positive	Not Analyzed	Not Analyzed	Positive	2	4	None	11.19
5	42	Female	59	160	23.0469	Unemployed	Primary School	60	No	No	No	No	No	No	Silent	Type 4	Negative	Negative	Negative	Negative	4	7	None	39.93
6	21	Male	65	185	18.992	Worker	University	30	No	No	No	No	No	No	Nonclassic	Type 3	Positive	Positive	Not Analyzed	Positive	1	5	None	14.43
7	27	Female	52	164	19.3337	Worker	University	24	No	No	No	No	No	No	Classic	Type 3	Positive	Positive	Not Analyzed	Positive	0	5	None	20.16
8	43	Female	57	163	21.4536	Unemployed	Secondary School	6	No	No	No	No	No	No	Classic	Type 3	Not Analyzed	Not AnalyzedNot Analyzed	Not Analyzed	Positive	6	3	None	46.15
9	30	Female	52	168	18.424	Unemployed	High School	324	No	No	No	No	No	No	Nonclassic	Type 3	Positive	Positive	Not Analyzed	Positive	4	6	None	31.01
10	32	Male	75	178	23.6713	Worker	University	18	No	No	No	No	No	No	Classic	Not classified	Not Analyzed	Negative	Not Analyzed	Positive	3	7	None	41.29
11	58	Female	95	164	35.3212	Unemployed	Primary School	84	No	No	No	There is	There is	No	Classic	Type 3	Positive	Negative	Not Analyzed	Positive	14	10	There is	42.38
12	20	Male	76	169	26.6097	Student	University	72	No	There is	No	No	No	No	Potential	Type 3	Negative	Positive	Not Analyzed	Positive	3	4	None	15.43
13	47	Female	68	165	24.977	Unemployed	Primary School	156	No	No	There is	No	No	No	Classic	Not classified	Not Analyzed	Negative	Not Analyzed	Positive	17	9	There is	75.94
14	45	Female	68	163	25.5937	Unemployed	University	12	There is	No	No	No	No	No	Classic	Not classified	Not Analyzed	Negative	Not Analyzed	Positive	5	6	None	46.87
15	29	Female	60	162	22.8624	Worker	University	36	No	No	No	No	No	No	Classic	Not classified	Not Analyzed	Positive	Not Analyzed	Positive	8	4	None	19.72
16	39	Female	63	167	22.5896	Unemployed	High School	108	No	No	There is	There is	No	No	Classic	Type 2	Negative	Positive	Not Analyzed	Negative	16	7	There is	81.49
17	56	Female	93	175	30.3673	Unemployed	Primary School	156	There is	There is	There is	No	No	No	Classic	Type 1	Negative	Negative	Not Analyzed	Negative	5	7	None	46.63
18	41	Male	73	178	23.04	Worker	High School	72	No	No	No	No	No	There is	Classic	Type 2	Positive	Positive	Positive	Positive	7	2	None	45.69
19	51	Female	92	155	38.2934	Unemployed	Primary School	12	There is	There is	No	No	No	No	Nonclassic	Type 2	Positive	Positive	Not Analyzed	Positive	5	4	None	65.53
20	32	Female	49	160	19.1406	Unemployed	Primary School	96	No	There is	No	No	There is	No	Classic	Type 1	Positive	Positive	Not Analyzed	Positive	12	7	There is	48.69
21	53	Female	78	159	30.8532	Unemployed	Primary School	144	No	No	No	No	No	No	Classic	Type 2	Negative	Positive	Not Analyzed	Positive	2	4	None	23.29
22	44	Female	64	163	24.0882	Worker	High School	60	No	No	No	No	No	No	Classic	Type 3	Negative	Negative	Not Analyzed	Positive	13	7	There is	37.4
23	44	Male	70	166	25.4028	Worker	University	12	No	No	No	No	No	No	Classic	Type 1	Not Analyzed	Positive	Not Analyzed	Positive	0	5	None	1
24	18	Male	72	170	24.9135	Worker	High School	24	No	No	No	No	No	No	Nonclassic	Type 1	Not Analyzed	Positive	Not Analyzed	Positive	0	1	None	18
25	48	Female	86	171	29.4108	Unemployed	Primary School	108	There is	No	No	There is	No	No	Classic	Not classified	Negative	Negative	Not Analyzed	Negative	12	7	There is	83.74
26	53	Female	85	158	34.049	Unemployed	Secondary School	12	No	There is	There is	No	No	No	Classic	Not classified	Not Analyzed	Not Analyzed	Not Analyzed	Positive	4	2	None	18
27	32	Female	49	158	19.6283	Worker	High School	108	No	No	No	No	No	No	Classic	Type 1	Positive	Not Analyzed	Not Analyzed	Positive	3	3	None	32.72
28	34	Female	69	160	26.9531	Unemployed	Primary School	156	No	No	No	No	No	No	Classic	Type 2	Negative	Negative	Not Analyzed	Negative	1	3	None	29.15
29	41	Female	51	160	19.9219	Unemployed	High School	240	No	No	There is	No	No	No	Classic	Type 3	Positive	Negative	Not Analyzed	Negative	3	6	None	43.29
30	33	Female	51	151	22.3674	Unemployed	Primary School	300	No	No	No	No	No	No	Classic	Not classified	Negative	Negative	Not Analyzed	Negative	3	4	None	83.97
31	33	Female	62	161	23.9188	Unemployed	Primary School	48	No	No	There is	No	No	No	Silent	Type 3	Negative	Negative	Not Analyzed	Positive	5	1	None	28.58
32	44	Female	75	169	26.2596	Worker	Primary School	36	No	No	There is	There is	No	No	Classic	Type 1	Negative	Negative	Not Analyzed	Positive	3	2	None	55.57
33	59	Female	67	158	26.8386	Unemployed	Primary School	144	There is	There is	No	No	No	No	Classic	Type 2	Negative	Negative	Not Analyzed	Negative	15	6	There is	35.15
34	21	Male	54	170	18.6851	Worker	University	12	No	No	No	No	No	No	Classic	Type 3	Negative	Positive	Not Analyzed	Positive	3	6	None	57.01
35	39	Female	70	169	24.5089	Worker	Secondary School	60	No	No	There is	No	No	There is	Classic	Type 3	Negative	Positive	Not Analyzed	Negative	16	8	There is	51.79
36	27	Female	60	158	24.0346	Unemployed	Secondary School	288	No	No	There is	No	No	No	Classic	Type 1	Negative	Negative	Not Analyzed	Negative	7	2	None	43.83
37	40	Female	39	150	17.3333	Unemployed	Primary School	48	No	No	No	No	No	No	Silent	Type 3	Negative	Negative	Not Analyzed	Negative	18	6	There is	87
38	38	Female	72	169		Unemployed	Primary School	3	No	No	No	No	No	No	Classic	Type 3	Positive	Negative	Not Analyzed	Not Analyzed	5	3	None	55.01
39	63	Female	68	151		Unemployed	Primary School	96	No	No	No	No	No	There is	Silent	Type 1	Positive	Negative	Negative	Negative	16	11	There is	63.55
40	53	Female	60	160	23.4	Unemployed	Secondary School	48	No	No	No	No	No	No	Classic	Type 1	Negative	Negative	Not Analyzed	Positive	1	1	None	18
41	22	Female	44	155	18.3	Worker	Secondary School	36	No	No	No	No	No	No	Classic	Type 1	Negative	Negative	Not Analyzed	Positive	17	10	There is	72.11
42	19	Male	62	170	21.5	Student	High School	30	No	No	No	No	No	No	Unclassified	Not classified	Not Analyzed	Positive	Not Analyzed	Positive	0	5	None	0
43	44	Female	68	156	27.9	Worker	Primary School	120	No	No	No	No	No	No	Classic	Type 2	Negative	Negative	Not Analyzed	Negative	5	2	None	44.78
44	28	Female	51	158	20.4	Worker	University	9	No	No	No	There is	No	There is	Classic	None	Positive	Negative	Not Analyzed	Positive	2	2	None	24.67
45	50	Female	93	164	346	Unemployed	Primary School	3	No	No	There is	There is	No	No	Classic	Not classified	Not Analyzed	Not Analyzed	Not Analyzed	Negative	2	1	None	23.86
46	47	Female	48.2	160	18.8	Unemployed	Primary School	24	No	No	There is	No	No	No	Classic	Type 2	Negative	Positive	Not Analyzed	Positive	5	2	None	53.87
47	54	Female	66	160	25.8	Unemployed	Primary School	12	No	No	No	No	No	There is	Classic	Type 1	Negative	Negative	Not Analyzed	Negative	1	1	None	34.93
48	42	Female	70	158	28	Unemployed	University	24	No	No	There is	No	No	There is	Classic	Not classified	Not Analyzed	Positive	Not Analyzed	Positive	5	1	None	25.72
49	41	Female	58	155	24.1	Unemployed	Primary School	60	No	There is	No	No	No	No	Silent	Type 3	Positive	Negative	Not Analyzed	Positive	15	5	There is	67.12
50	50	Male	61	169	21.4	Worker	Secondary School	18	No	No	No	No	No	No	Classic	Type 3	Positive	Positive	Negative	Positive	0	6	None	17.62
51	41	Female	90	162	34.3	Unemployed	Primary School	156	No	No	There is	No	No	There is	Silent	Type 3	Negative	Negative	Not Analyzed	Positive	5	2	None	35.3
52	48	Female	65	160	25.4	Unemployed	Primary School	72	No	No	No	No	No	No	Silent	Type 2	Negative	Negative	Not Analyzed	Negative	13	7	There is	63.72
53	41	Male	59	170	20.4	Worker	Primary School	6	No	No	No	No	No	No	Classic	Type 2	Negative	Positive	Not Analyzed	Positive	1	4	None	13.76
54	38	Female	56	160	21.9	Worker	Primary School	84	No	No	No	No	No	No	Classic	Type 3	Positive	Positive	Not Analyzed	Positive	4	1	None	41.58
55	51	Female	78	163	29.4	Worker	Primary School	120	No	No	There is	No	No	No	Silent	Type 3	Negative	Negative	Negative	Negative	13	5	There is	43.65
56	20	Female	45	177	14.4	Student	High School	1	No	No	No	No	No	No	Classic	Type 3	Positive	Positive	Not Analyzed	Positive	4	2	None	52.91
57	51	Female	63	155	26.2	Unemployed	Primary School	60	No	No	There is	No	No	No	Classic	Type 3	Positive	Positive	Not Analyzed	Positive	2	1	None	23.86
58	50	Female	63	163	23.7	Worker	University	240	No	No	There is	No	There is	No	Silent	Type 2	Positive	Positive	Not Analyzed	Positive	3	5	None	30.95
59	44	Female	60	163	22.6	Worker	Primary School	1	No	No	No	No	No	No	Classic	Not classified	Not Analyzed	Positive	Not Analyzed	Positive	3	3	None	74.21
60	25	Female	57	160	22.3	Worker	High School	4	No	No	No	No	No	There is	Classic	Not classified	Not Analyzed	Positive	Not Analyzed	Positive	4	3	None	60.67
